# Supplementary material for: Enhancing effects of reduced graphene oxide on photoluminescence of CsPbBr3 perovskite quantum dots
Source: Royal Society of Chemistry journal article supplement (doi:10.1039/d0tc01069c), 2020-01-01
Supplement: d0tc01069c1.pdf [file d0tc01069c1.pdf]

## Supplementary Material

# Enhancing Effects of Reduced Graphene Oxide on Photoluminescence of CsPbBr<sub>3</sub> Perovskite Quantum Dots

Yongjie Pu,<sup>†</sup> Wenqiang Liu,<sup>‡,§,1</sup> Yunyong Liu,<sup>†,1</sup> Qiwei Jiang,<sup>†</sup> Yinli Li,<sup>†</sup> Zuncheng  
Zhao,<sup>†</sup> Guodong Yuan,<sup>\*,‡,§</sup> and Yang Zhang<sup>\*,†</sup>

<sup>†</sup> Henan Engineering Laboratory of Matrix Composites, Department of Physics, Henan  
University, Kaifeng, Henan 475004 China

<sup>‡</sup> State Key Laboratory for Superlattices and Microstructures, Institute of  
Semiconductors, Chinese Academy of Sciences, Beijing 100083 China

<sup>§</sup> University of Chinese Academy of Sciences, Beijing 100049 China

### Corresponding Author

\* E-mail: yzhang@henu.edu.cn; gdyuan@semi.ac.cn

<sup>1</sup> These authors contributed equally to this work.

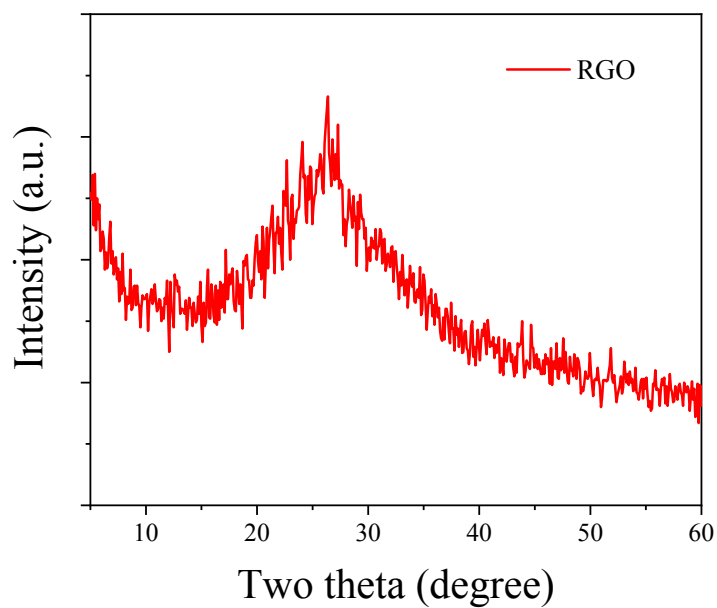

Figure S1. XRD pattern of RGO

Figure S1 shows the XRD pattern of RGO. The peak at  $26^\circ$  confirms the presence of RGO.

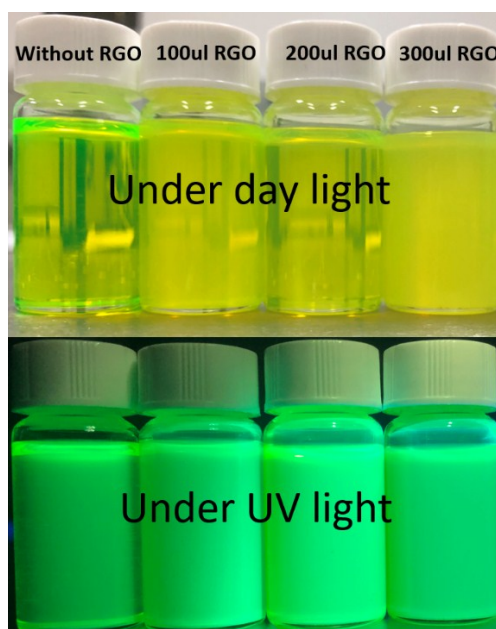

Figure S2. Photographs of the samples under daylight and UV light of 365 nm.

Figure S2 shows the photographs of the bare CsPbBr<sub>3</sub> QDs, and CsPbBr<sub>3</sub> QD/RGO (100, 200 and 300 μL) solutions under daylight and UV light of 365 nm. All solutions are clear, indicating that the adding of RGO does not lead to aggregation of QDs.

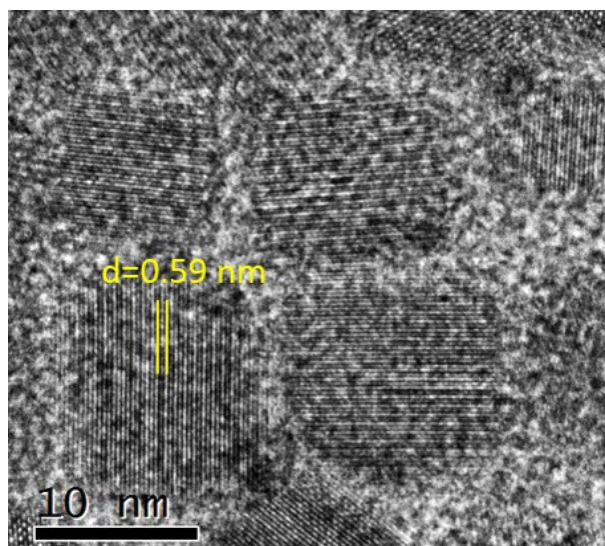

Figure S3 HRTEM image of pure CsPbBr<sub>3</sub> QDs

The HRTEM image of bare CsPbBr<sub>3</sub> QDs is shown in the following, and added in supporting information as Figure S3. The interplanar distance of 0.59 nm corresponds to (110) crystal facet in orthorhombic phase of CsPbBr<sub>3</sub>.

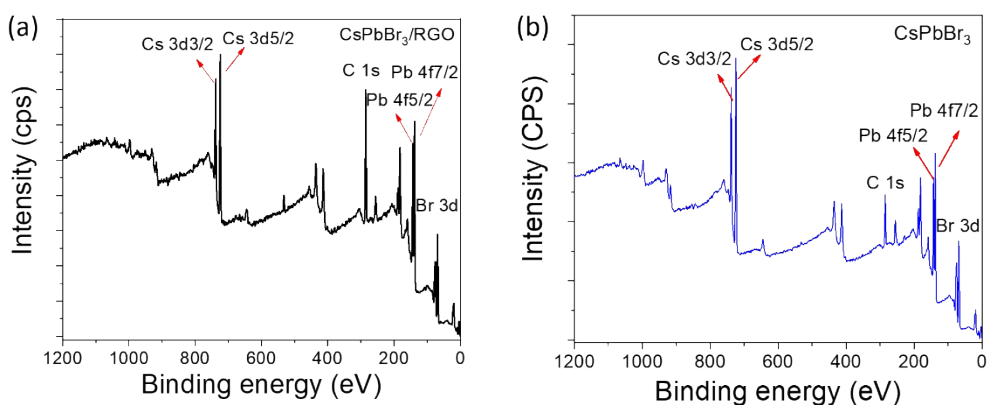

Figure S4. The survey XPS spectra of bare CsPbBr<sub>3</sub> QDs and CsPbBr<sub>3</sub> QDs/RGO composite with 200  $\mu$ L RGO in starting solution.

We can clearly identify the existence of Cs, Pb, Br, C from peaks of Cs 3d, Pb 4f, Br 3d, C 1s. In contrast, their positions do not shift, which means the chemical environments of Cs 3d, Pb 4f, Br 3d are not changed by adding RGO. However, the C content in CsPbBr<sub>3</sub> QDs/RGO composite is higher than that in bare CsPbBr<sub>3</sub> QDs because the intensity of C 1s peak in CsPbBr<sub>3</sub> QDs/RGO composite is much stronger than that in CsPbBr<sub>3</sub> QDs. This result indicates that RGO sheets were composited with CsPbBr<sub>3</sub> QDs.
